# Supplementary material for: After‐Effects of Time‐Restricted Feeding on Whole‐Body Metabolism and Gene Expression in Four Different Peripheral Tissues
Source: PubMed Central journal article supplement — Obesity (Silver Spring). 2020 May 31;28(Suppl 1):S68–80. doi: 10.1002/oby.22830 (PMC7496197; doi:10.1002/oby.22830), 2020-05-31
Supplement: OBY-28-S68-s001.pdf [file OBY-28-S68-s001.pdf]

# S1

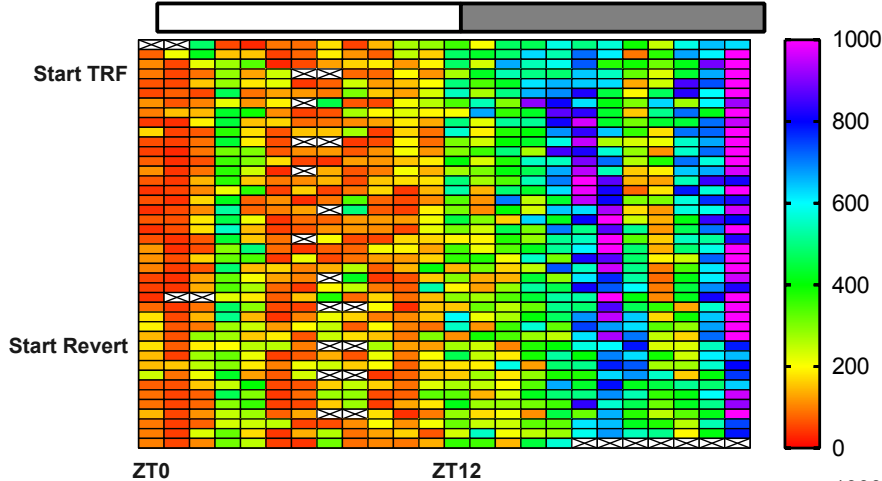

# AL

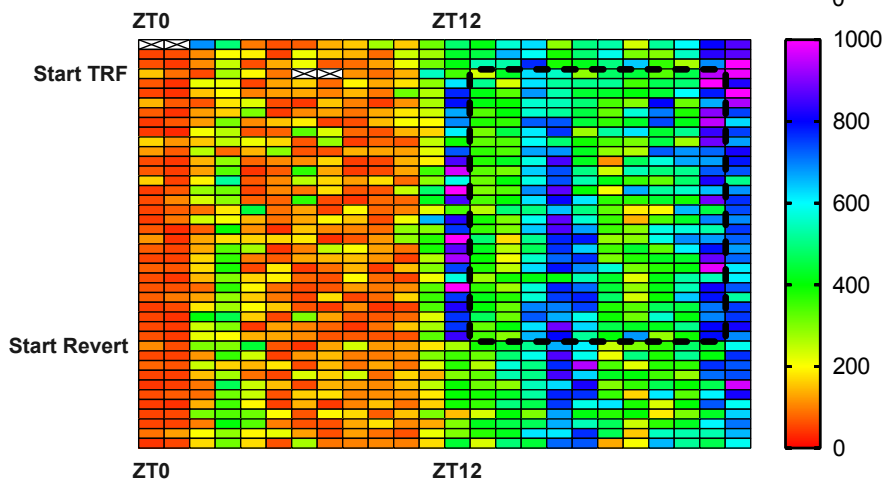

# DF

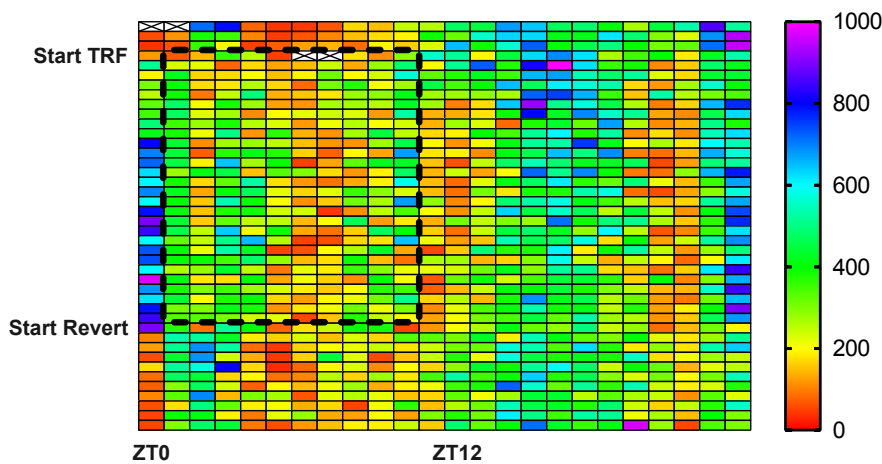

# LF

Figure S1 Heatmaps visualizing the daily patterns in locomotor activity. Each heatmap displays the activity patterns for one of the three experimental groups throughout the entire experiment. Each line corresponds to one day (24h) and each rectangular depicts the average value of all animals in the group for one hour. The period during which food was restricted for both the dark-fed and light-fed animals is framed by the dashed black rectangular. Locomotor activity is presented as arbitrary units (AU). n=4, n=6 and n=6 for the AL, dark-fed and light-fed animals, respectively.
