# Supplementary material for: After‐Effects of Time‐Restricted Feeding on Whole‐Body Metabolism and Gene Expression in Four Different Peripheral Tissues
Source: PubMed Central journal article supplement — Obesity (Silver Spring). 2020 May 31;28(Suppl 1):S68–80. doi: 10.1002/oby.22830 (PMC7496197; doi:10.1002/oby.22830), 2020-05-31
Supplement: OBY-28-S68-s004.pdf [file OBY-28-S68-s004.pdf]

**S4a**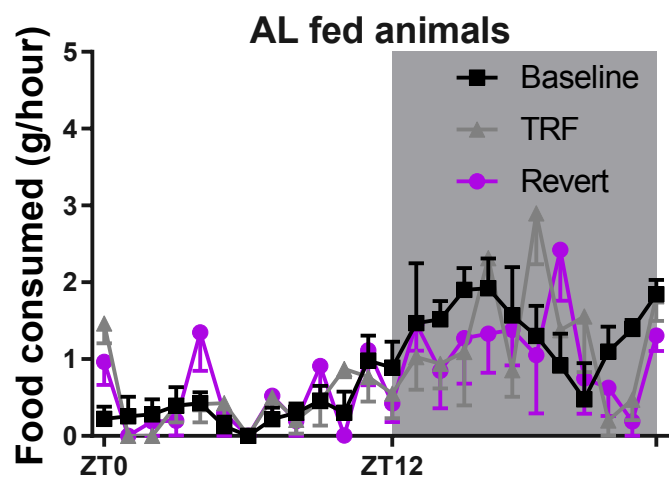**b**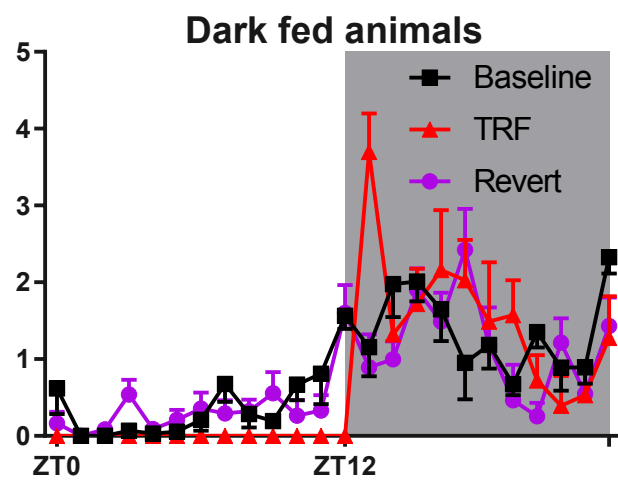**c**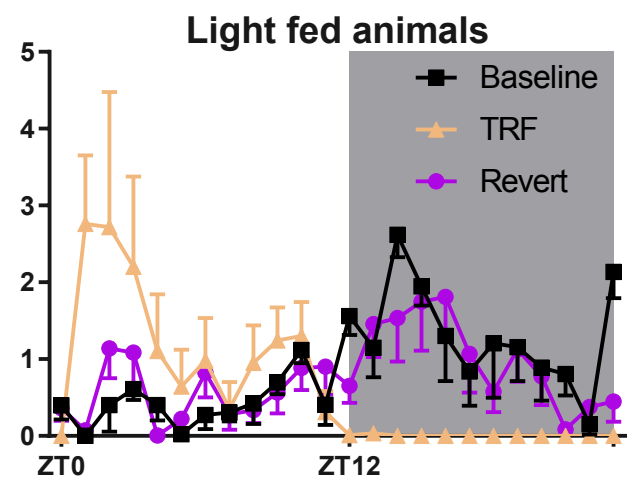**d**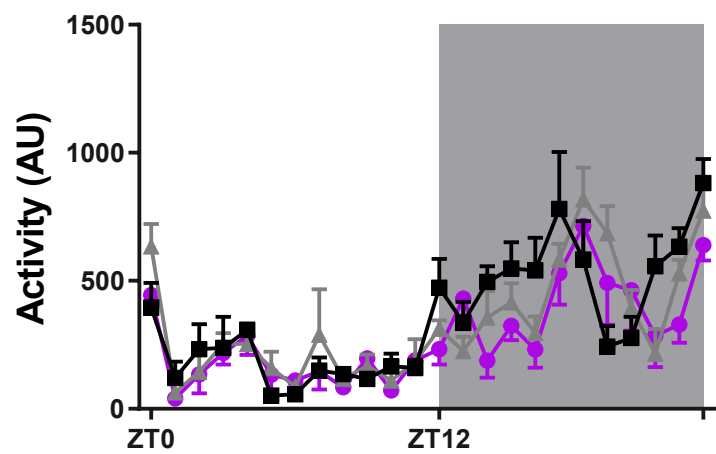**e**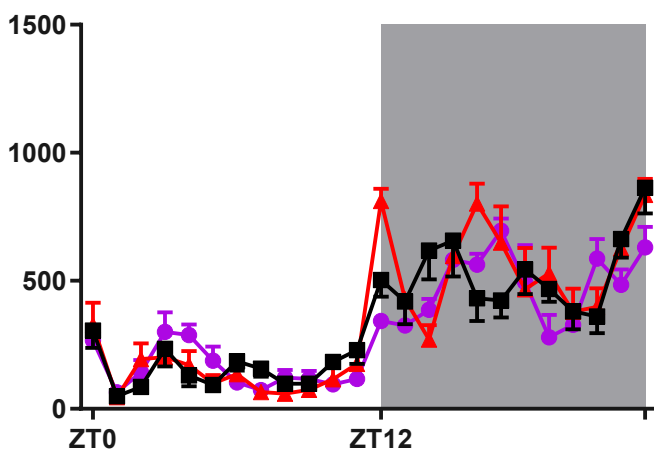**f**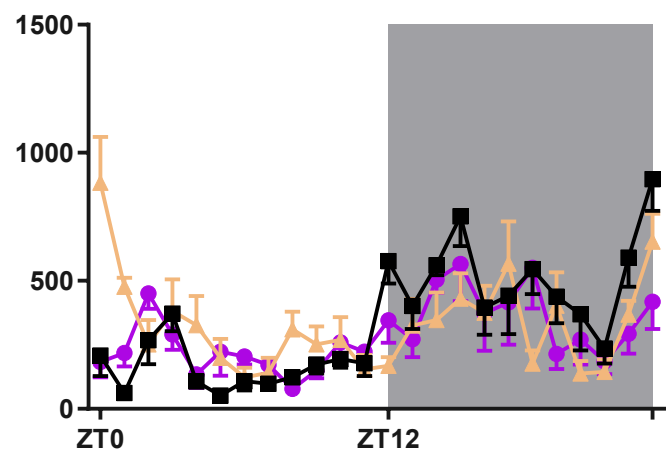**g**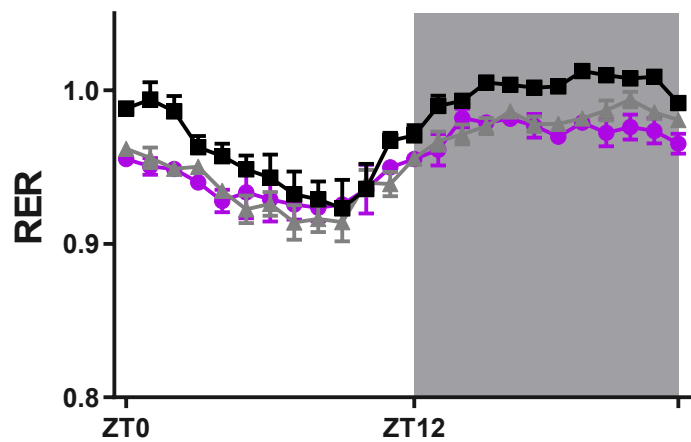**h**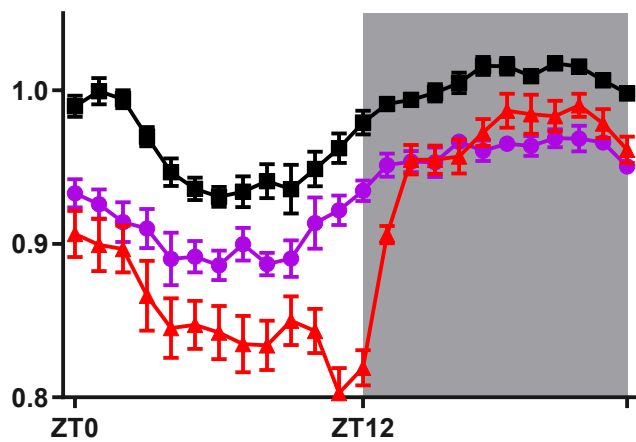**i**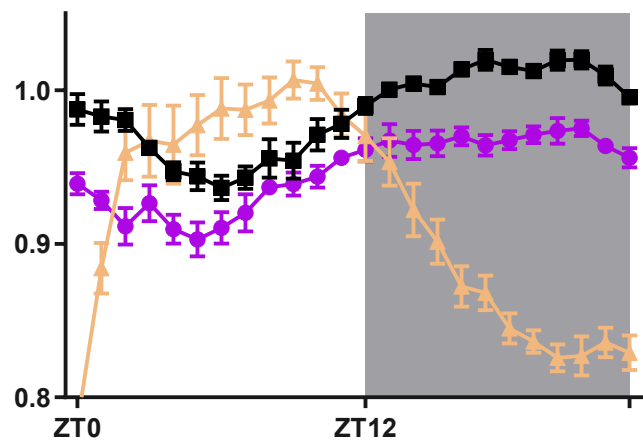**j**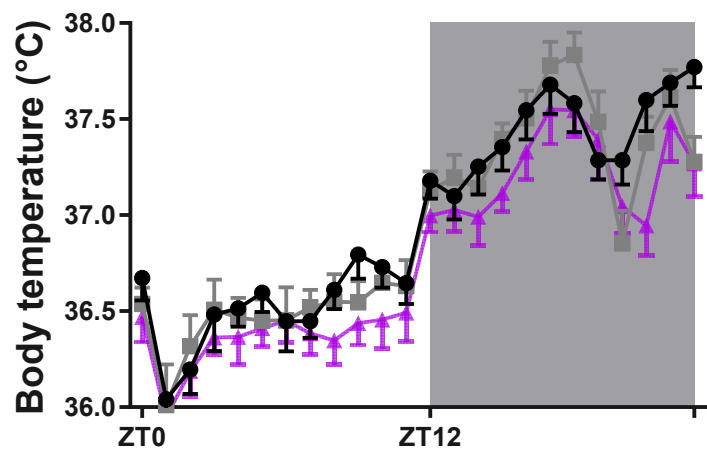**k**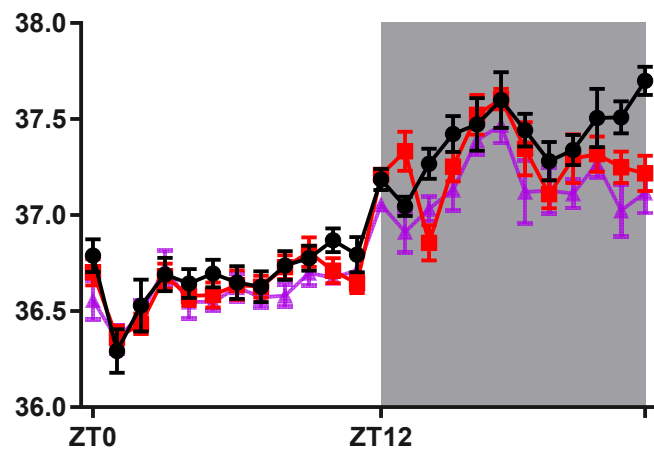**l**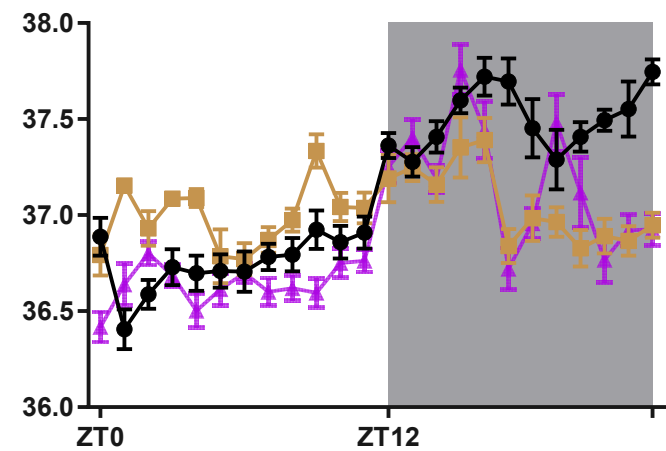

Figure S4 Summaries of metabolic parameters (food intake, activity, RER and body temperature) during the 3 different experimental phases. S4a-l: Analysis of the daily food intake (a-c) locomotor activity (d-f), RER (g-i) and subcutaneous body temperature (j-l) of the animals during each of the 3 experimental phases. Figures in the left, middle and right column are the 24 h traces of the AL-fed, Dark fed and Light-fed animals, respectively. Food intake, activity and RER values are averages of the last 2 days of each experimental phase, body temperature values are averages of the last 3 days of each experimental phase. Locomotor activity is presented as arbitrary units (AU). Data are represented as mean $\pm$ SEM. Shaded areas represent the dark period. For the food intake, activity and RER measures (Figures S4a-i) n=4, n=6 and n=6 for the AL, dark-fed and light-fed animals, respectively. For the body temperature measures (Figures S4j-l) n=6, n=7 and n=7 for the AL, dark-fed and light-fed animals respectively.
