# Supplementary material for: After‐Effects of Time‐Restricted Feeding on Whole‐Body Metabolism and Gene Expression in Four Different Peripheral Tissues
Source: PubMed Central journal article supplement — Obesity (Silver Spring). 2020 May 31;28(Suppl 1):S68–80. doi: 10.1002/oby.22830 (PMC7496197; doi:10.1002/oby.22830), 2020-05-31
Supplement: OBY-28-S68-s006.pdf [file OBY-28-S68-s006.pdf]

**S6****Liver****BAT****Soleus****Gastrocnemius****Glucokinase****Cpt1b****Cpt1a****Cpt1b**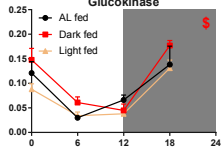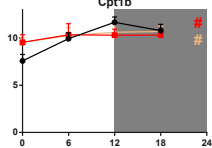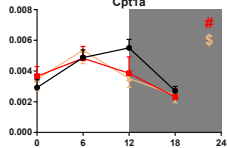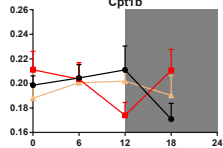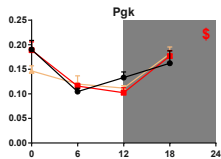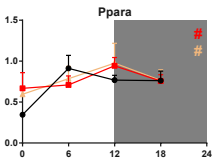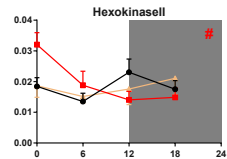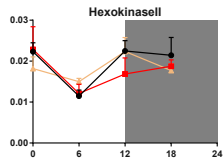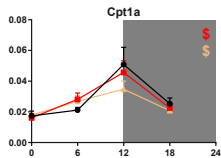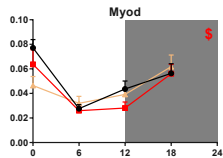**Time (ZT)**

Figure S6 After-effects of 4 weeks of TRF on expression profiles of metabolic genes in liver, BAT, Soleus and Gastrocnemius tissues in the rats 11 days after the revert to ad libitum feeding conditions. Shaded areas represent the dark period. N = 4 \* 6 per time point and experimental group. # = Difference in rhythmicity compared to ad libitum feeding conditions (gain/loss of rhythm). \$ = Difference in acrophase compared to ad libitum feeding conditions. Pgk=phosphoglycerate kinase, Cpt1=carnitine palmitoyltransferase I, Ppara=peroxisome proliferator-activated receptor alpha, Myod=myoblast determination protein 1.
